# Supplementary material for: Gut Microbiota Functional Biomolecules With Immune-Lipid Metabolism for a Prognostic Compound Score in Epstein-Barr Virus-Associated Gastric Adenocarcinoma: A Pilot Study
Source: PubMed Central journal article supplement — Clin Transl Gastroenterol. 2019 Oct 17;10(10):e00074. doi: 10.14309/ctg.0000000000000074 (PMC6884346; doi:10.14309/ctg.0000000000000074), 2019-10-17
Supplement: ct9-10-e00074-s001.pdf [file ct9-10-e00074-s001.pdf]

Table S1. Protein name, antibody and diluted concentration

| KEGG Entry | Common name | Gene symbol |                               | Primary antibody name in Abcam | Product ID | Dilution |
|------------|-------------|-------------|-------------------------------|--------------------------------|------------|----------|
| K19459     | LMP1        | LMP1        | EBV Latent Membrane Protein 1 | EBV Latent Membrane Protein 1  | ab78113    | 1:150    |
| K19457     | EBNA2       | EBNA2       |                               | EBNA2                          | ab90543    | 1:150    |
| K01068     | ACOT1       | ACOT1       |                               | ACOT1                          | ab100915   | 1:200    |
| K01068     | ACOT4       | ACOT4       |                               | ACOT4                          | ab121116   | 1:200    |
| K06547     | CD166       | ALCAM       |                               | CD166                          | ab109215   | 1:150    |
| K04365     | BRAF        | BRAF        |                               | BRAF                           | ab33899    | 1:300    |
| K06745     | PDL1        | CD274       |                               | PDL1                           | ab205921   | 1:300    |
| K06746     | B7H3        | CD276       |                               | B7H3                           | ab134161   | 1:400    |
| K06454     | CD4         | CD4         |                               | CD4                            | ab183685   | 1:300    |
| K03985     | CD87        | CD87        |                               | U-PAR                          | ab218106   | 1:250    |
| K10031     | CXCL12      | CXCL12      |                               | SDF1                           | ab9797     | 1:200    |
| K10032     | CXCL13      | CXCL13      |                               | BCA1                           | ab199043   | 1:200    |
| K10226     | FADS2       | FADS2       |                               | FADS2                          | ab170665   | 1:300    |
| K10225     | FADS3       | FADS3       |                               | FADS3                          | ab232810   | 1:350    |
| K12419     | FADS6       | FADS6       |                               | FADS6                          | ab150795   | 1:300    |
| K07515     | HADHA       | HADHA       |                               | HADHA                          | ab203114   | 1:400    |
| K06751     | MHC-1       | HLAA        |                               | MHC class I                    | ab15681    | 1:300    |
| K06751     | MHC-2       | HLAB        |                               | HLA-B                          | ab225636   | 1:350    |
| K06751     | MHC-3       | HLAC        |                               | HLA-C                          | ab232903   | 1:350    |
| K01074     | PPT1        | PPT1        |                               | PPT1                           | ab38417    | 1:300    |
| K01074     | PPT2        | PPT2        |                               | PPT2                           | ab160459   | 1:200    |
| K03172     | TRAF1       | TRAF1       |                               | TRAF1                          | ab203316   | 1:250    |
| K03173     | TRAF2       | TRAF2       |                               | TRAF2                          | ab126758   | 1:300    |

Table S2. Consistency of protein measurements

| IHC category | Kappa | P value |
|--------------|-------|---------|
| ACOT1        | 0.428 | <0.001  |
| CD166        | 0.483 | <0.001  |
| B7H3         | 0.476 | <0.001  |
| CXCL12       | 0.565 | <0.001  |
| HCAA         | 0.413 | <0.001  |
| CD87         | 0.484 | <0.001  |
| HLAB         | 0.487 | <0.001  |
| TRAF1        | 0.496 | <0.001  |

Crosstabs of ACOT1 score

| score   | ACOT1_ave2 |    |    |    |    |    |   |   |    | Total |
|---------|------------|----|----|----|----|----|---|---|----|-------|
| score   | 0          | 1  | 2  | 3  | 4  | 6  | 8 | 9 | 12 |       |
| 0       | 47         | 18 | 0  | 0  | 0  | 0  | 0 | 0 | 0  | 65    |
| 1       | 18         | 60 | 27 | 0  | 0  | 0  | 0 | 0 | 0  | 105   |
| 2       | 0          | 34 | 65 | 33 | 0  | 0  | 0 | 0 | 0  | 132   |
| ACO 3   | 0          | 0  | 15 | 50 | 10 | 13 | 8 | 0 | 0  | 96    |
| T1_av 4 | 0          | 0  | 0  | 12 | 29 | 23 | 0 | 6 | 0  | 70    |
| el 6    | 0          | 0  | 0  | 14 | 1  | 26 | 4 | 2 | 0  | 47    |
| 8       | 0          | 0  | 0  | 6  | 0  | 4  | 1 | 0 | 0  | 11    |
| 9       | 0          | 0  | 0  | 0  | 4  | 3  | 1 | 3 | 0  | 11    |
| 12      | 0          | 2  | 0  | 0  | 0  | 0  | 0 | 0 | 0  | 2     |
| Total   | 0          | 0  | 0  | 0  | 0  | 0  | 0 | 0 | 1  | 1     |

Crosstabs of CD166 score

| score   | CD166_ave2 |     |     |     |    |    |    |    |    | Total |
|---------|------------|-----|-----|-----|----|----|----|----|----|-------|
| score   | 0          | 1   | 2   | 3   | 4  | 6  | 8  | 9  | 12 |       |
| 0       | 50         | 22  | 0   | 0   | 0  | 0  | 0  | 0  | 0  | 72    |
| 1       | 17         | 61  | 29  | 0   | 0  | 0  | 0  | 0  | 0  | 107   |
| 2       | 0          | 28  | 68  | 21  | 0  | 0  | 0  | 0  | 0  | 117   |
| CD16 3  | 0          | 0   | 18  | 65  | 13 | 12 | 2  | 0  | 0  | 110   |
| 6_ave 4 | 0          | 0   | 0   | 9   | 37 | 23 | 0  | 5  | 0  | 74    |
| 1 6     | 0          | 0   | 0   | 6   | 1  | 16 | 7  | 4  | 0  | 34    |
| 8       | 0          | 0   | 0   | 4   | 0  | 4  | 3  | 0  | 0  | 11    |
| 9       | 0          | 0   | 0   | 0   | 3  | 5  | 0  | 7  | 0  | 15    |
| 12      | 0          | 0   | 0   | 0   | 0  | 0  | 0  | 0  | 0  | 0     |
| Total   | 67         | 111 | 115 | 105 | 54 | 60 | 12 | 16 | 0  | 540   |

Crosstabs of B7H3 score

| score |    | B7H3_ave2 |    |     |    |    |   |    |    |     | Total |
|-------|----|-----------|----|-----|----|----|---|----|----|-----|-------|
| score | 0  | 1         | 2  | 3   | 4  | 6  | 8 | 9  | 12 |     |       |
| 0     | 33 | 31        | 0  | 0   | 0  | 0  | 0 | 0  | 0  | 64  |       |
| 1     | 0  | 71        | 0  | 0   | 0  | 0  | 0 | 0  | 0  | 71  |       |
| 2     | 0  | 49        | 53 | 40  | 0  | 0  | 0 | 0  | 0  | 142 |       |
| 3     | 0  | 0         | 0  | 61  | 32 | 0  | 0 | 0  | 0  | 93  |       |
| 4     | 0  | 0         | 0  | 0   | 46 | 21 | 0 | 9  | 0  | 76  |       |
| 6     | 0  | 0         | 0  | 35  | 0  | 25 | 6 | 8  | 0  | 74  |       |
| 8     | 0  | 0         | 0  | 8   | 0  | 0  | 2 | 2  | 0  | 12  |       |
| 9     | 0  | 0         | 0  | 0   | 0  | 0  | 0 | 8  | 0  | 8   |       |
| 12    | 0  | 0         | 0  | 0   | 0  | 0  | 0 | 0  | 0  | 0   |       |
| Total | 33 | 151       | 53 | 144 | 78 | 46 | 8 | 27 | 0  | 540 |       |

Crosstabs of CXCL12 score

| score |    | CXCL12_ave2 |    |     |    |    |    |   |    |     | Total |
|-------|----|-------------|----|-----|----|----|----|---|----|-----|-------|
| score | 0  | 1           | 2  | 3   | 4  | 6  | 8  | 9 | 12 |     |       |
| 0     | 40 | 28          | 0  | 0   | 0  | 0  | 0  | 0 | 0  | 68  |       |
| 1     | 12 | 70          | 20 | 0   | 0  | 0  | 0  | 0 | 0  | 102 |       |
| 2     | 0  | 33          | 57 | 18  | 0  | 0  | 0  | 0 | 0  | 108 |       |
| 3     | 0  | 0           | 20 | 70  | 12 | 19 | 4  | 0 | 0  | 125 |       |
| 4     | 0  | 0           | 0  | 13  | 30 | 22 | 0  | 1 | 0  | 66  |       |
| 6     | 0  | 0           | 0  | 20  | 0  | 26 | 4  | 3 | 0  | 53  |       |
| 8     | 0  | 0           | 0  | 1   | 0  | 4  | 3  | 0 | 0  | 8   |       |
| 9     | 0  | 0           | 0  | 0   | 4  | 4  | 0  | 1 | 0  | 9   |       |
| 12    | 0  | 0           | 0  | 0   | 0  | 0  | 0  | 0 | 1  | 1   |       |
| Total | 52 | 131         | 97 | 122 | 46 | 75 | 11 | 5 | 1  | 540 |       |

Crosstabs of HLAA score

| score     |    | HLAA_ave2 |     |     |    |    |    |   |    |     | Total |
|-----------|----|-----------|-----|-----|----|----|----|---|----|-----|-------|
| score     | 0  | 1         | 2   | 3   | 4  | 6  | 8  | 9 | 12 |     |       |
| 0         | 39 | 27        | 0   | 0   | 0  | 0  | 0  | 0 | 0  | 66  |       |
| 1         | 12 | 44        | 24  | 0   | 0  | 0  | 0  | 0 | 0  | 80  |       |
| 2         | 0  | 29        | 64  | 21  | 0  | 0  | 0  | 0 | 0  | 114 |       |
| HLA A_ave | 3  | 0         | 0   | 20  | 65 | 14 | 13 | 9 | 0  | 121 |       |
| 4         | 0  | 0         | 0   | 17  | 42 | 24 | 0  | 3 | 0  | 86  |       |
| 1         | 6  | 0         | 0   | 0   | 18 | 1  | 18 | 3 | 3  | 43  |       |
|           | 8  | 0         | 0   | 0   | 7  | 0  | 5  | 1 | 1  | 14  |       |
|           | 9  | 0         | 0   | 0   | 0  | 7  | 6  | 0 | 2  | 15  |       |
|           | 12 | 0         | 0   | 0   | 0  | 0  | 0  | 0 | 0  | 1   |       |
| Total     | 51 | 100       | 108 | 128 | 64 | 66 | 13 | 9 | 1  | 540 |       |

Crosstabs of CD87 score

| score    |    | CD87_ave2 |     |     |    |    |    |    |    |     | Total |
|----------|----|-----------|-----|-----|----|----|----|----|----|-----|-------|
| score    | 0  | 1         | 2   | 3   | 4  | 6  | 8  | 9  | 12 |     |       |
| 0        | 43 | 9         | 0   | 0   | 0  | 0  | 0  | 0  | 0  | 52  |       |
| 1        | 18 | 68        | 30  | 0   | 0  | 0  | 0  | 0  | 0  | 116 |       |
| 2        | 0  | 30        | 68  | 17  | 0  | 0  | 0  | 0  | 0  | 115 |       |
| CD87_ave | 3  | 0         | 0   | 15  | 67 | 7  | 14 | 6  | 0  | 109 |       |
| 1        | 4  | 0         | 0   | 0   | 17 | 32 | 28 | 0  | 2  | 79  |       |
|          | 6  | 0         | 0   | 0   | 8  | 0  | 23 | 5  | 5  | 41  |       |
|          | 8  | 0         | 0   | 0   | 3  | 0  | 6  | 3  | 2  | 14  |       |
|          | 9  | 0         | 0   | 0   | 0  | 4  | 6  | 1  | 1  | 12  |       |
|          | 12 | 0         | 0   | 0   | 0  | 0  | 0  | 0  | 2  | 2   |       |
| Total    | 61 | 107       | 113 | 112 | 43 | 77 | 15 | 10 | 2  | 540 |       |

Crosstabs of HLAB score

| score |    | HLAB_ave2 |     |     |    |    |    |    |   | Total |     |
|-------|----|-----------|-----|-----|----|----|----|----|---|-------|-----|
| score |    | 33        | 26  | 0   | 0  | 0  | 0  | 0  | 0 | 12    |     |
|       | 0  | 24        | 68  | 29  | 0  | 0  | 0  | 0  | 0 | 0     | 59  |
|       | 1  | 0         | 36  | 59  | 24 | 0  | 0  | 0  | 0 | 0     | 121 |
|       | 2  | 0         | 0   | 17  | 62 | 15 | 0  | 3  | 0 | 0     | 119 |
| HLA   | 3  | 0         | 0   | 0   | 7  | 40 | 13 | 0  | 2 | 0     | 97  |
| B_ave | 4  | 0         | 0   | 0   | 0  | 15 | 40 | 6  | 0 | 0     | 62  |
| 1     | 6  | 0         | 0   | 0   | 5  | 0  | 6  | 5  | 1 | 0     | 61  |
|       | 8  | 0         | 0   | 0   | 0  | 1  | 0  | 0  | 3 | 0     | 17  |
|       | 9  | 33        | 26  | 0   | 0  | 0  | 0  | 0  | 0 | 0     | 4   |
|       | 12 | 0         | 0   | 0   | 0  | 1  | 0  | 0  | 0 | 0     | 0   |
| Total |    | 57        | 130 | 105 | 98 | 71 | 59 | 14 | 6 | 0     | 540 |

Crosstabs of TRAF1 score

| score |    | TRAF1_ave2 |     |     |     |    |    |    |   | Total |     |
|-------|----|------------|-----|-----|-----|----|----|----|---|-------|-----|
| score |    | 0          | 1   | 2   | 3   | 4  | 6  | 8  | 9 | 12    |     |
|       | 0  | 43         | 18  | 0   | 0   | 0  | 0  | 0  | 0 | 0     | 61  |
|       | 1  | 19         | 86  | 26  | 0   | 0  | 0  | 0  | 0 | 0     | 131 |
|       | 2  | 0          | 34  | 57  | 21  | 0  | 0  | 0  | 0 | 0     | 112 |
| TRAF  | 3  | 0          | 0   | 18  | 73  | 9  | 11 | 7  | 0 | 0     | 118 |
| 1_ave | 4  | 0          | 0   | 0   | 20  | 37 | 12 | 0  | 0 | 0     | 69  |
| 1     | 6  | 0          | 0   | 0   | 8   | 1  | 10 | 4  | 3 | 0     | 26  |
|       | 8  | 0          | 0   | 0   | 2   | 0  | 3  | 4  | 0 | 0     | 9   |
|       | 9  | 0          | 0   | 0   | 0   | 3  | 4  | 0  | 5 | 0     | 12  |
|       | 12 | 0          | 0   | 0   | 0   | 0  | 0  | 0  | 0 | 2     | 2   |
| Total |    | 62         | 138 | 101 | 124 | 50 | 40 | 15 | 8 | 2     | 540 |

Table S3 All of 21 proteins expression in gastric adenocarcinoma

| Test result | vPosGE | Sensitivity | 1 - specificity | Yoden index |
|-------------|--------|-------------|-----------------|-------------|
| AC011 score | 2.75   | 0.536       | 0.254           | 0.282       |
|             | 2.25   | 0.362       | 0.166           | 0.252       |
|             | 3.25   | 0.418       | 0.195           | 0.223       |
|             | 3.75   | 0.372       | 0.161           | 0.211       |
|             | 4.25   | 0.306       | 0.123           | 0.183       |
|             | 1.75   | 0.701       | 0.521           | 0.18        |
|             | 1.25   | 0.806       | 0.644           | 0.182       |
|             | 4.75   | 0.243       | 0.089           | 0.154       |
|             | 5.25   | 0.188       | 0.064           | 0.124       |
|             | 0.75   | 0.895       | 0.784           | 0.111       |
|             | 5.75   | 0.155       | 0.047           | 0.108       |
|             | 6.25   | 0.089       | 0.021           | 0.068       |
|             | 6.75   | 0.059       | 0.017           | 0.042       |
|             | 7.25   | 0.043       | 0.004           | 0.039       |
|             | 0.25   | 0.924       | 0.898           | 0.029       |
|             | 7.75   | 0.026       | 0.004           | 0.022       |
|             | 8.25   | 0.023       | 0.004           | 0.019       |
|             | 8.75   | 0.02        | 0.004           | 0.016       |
|             | 9.75   | 0.013       | 0               | 0.013       |
|             | 11.25  | 0.003       | 0               | 0.003       |
|             | -1     | 1           | 0               | 0           |
|             | 13     | 0           | 0               | 0           |

  

| Test result | vPosGE | Sensitivity | 1 - specificity | Yoden index |
|-------------|--------|-------------|-----------------|-------------|
| HA1 score   | 2.75   | 0.589       | 0.343           | 0.246       |
|             | 2.25   | 0.661       | 0.424           | 0.237       |
|             | 1.75   | 0.766       | 0.559           | 0.207       |
|             | 3.25   | 0.451       | 0.246           | 0.205       |
|             | 3.75   | 0.385       | 0.199           | 0.186       |
|             | 1.25   | 0.852       | 0.674           | 0.178       |
|             | 4.25   | 0.296       | 0.14            | 0.156       |
|             | 0.75   | 0.918       | 0.775           | 0.143       |
|             | 4.75   | 0.224       | 0.102           | 0.122       |
|             | 5.25   | 0.174       | 0.064           | 0.11        |
|             | 5.75   | 0.135       | 0.047           | 0.088       |
|             | 0.25   | 0.964       | 0.881           | 0.083       |
|             | 6.25   | 0.089       | 0.03            | 0.059       |
|             | 7.25   | 0.053       | 0               | 0.053       |
|             | 6.75   | 0.066       | 0.017           | 0.049       |
|             | 7.75   | 0.023       | 0               | 0.023       |
|             | 8.25   | 0.015       | 0               | 0.015       |
|             | 8.75   | 0.016       | 0               | 0.016       |
|             | 9.5    | 0.01        | 0               | 0.01        |
|             | 10.25  | 0.007       | 0               | 0.007       |
|             | -1     | 1           | 0               | 0           |
|             | 11.5   | 0           | 0               | 0           |

  

| Test result | vPosGE | Sensitivity | 1 - specificity | Yoden index |
|-------------|--------|-------------|-----------------|-------------|
| AC014 score | 4.75   | 0.253       | 0.229           | 0.024       |
|             | 5.75   | 0.155       | 0.144           | 0.011       |
|             | 4.25   | 0.303       | 0.301           | 0.002       |
|             | 11.5   | 0           | 1               | 0           |
|             | 0      | 0           | 0               | 0           |
|             | 9.75   | 0           | 0.004           | -0.004      |
|             | 5.25   | 0.171       | 0.178           | -0.007      |
|             | 1.25   | 0.845       | 0.852           | -0.007      |
|             | 0.25   | 0.957       | 0.966           | -0.009      |
|             | 2.25   | 0.834       | 0.844           | -0.012      |
|             | 8.25   | 0.007       | 0.021           | -0.014      |
|             | 8.75   | 0.003       | 0.017           | -0.014      |
|             | 1.75   | 0.76        | 0.78            | -0.02       |
|             | 7.75   | 0.014       | 0.014           | -0.021      |
|             | 6.75   | 0.063       | 0.085           | -0.022      |
|             | 7.25   | 0.026       | 0.055           | -0.029      |
|             | 0.75   | 0.918       | 0.949           | -0.031      |
|             | 6.25   | 0.075       | 0.114           | -0.038      |
|             | 3.75   | 0.375       | 0.424           | -0.041      |
|             | 2.75   | 0.559       | 0.61            | -0.051      |
|             | 3.25   | 0.414       | 0.479           | -0.065      |

  

| Test result | vPosGE | Sensitivity | 1 - specificity | Yoden index |
|-------------|--------|-------------|-----------------|-------------|
| CD4 score   | 4.75   | 0.22        | 0.216           | 0.004       |
|             | 0.25   | 0.964       | 0.982           | 0.002       |
|             | -1     | 1           | 1               | 0           |
|             | 13     | 0           | 0               | 0           |
|             | 5.25   | 0.158       | 0.161           | -0.008      |
|             | 11.25  | 0           | 0.004           | -0.004      |
|             | 0.75   | 0.924       | 0.928           | -0.004      |
|             | 7.25   | 0.046       | 0.051           | -0.005      |
|             | 8.25   | 0.018       | 0.021           | -0.005      |
|             | 5.75   | 0.138       | 0.144           | -0.006      |
|             | 7.75   | 0.023       | 0.03            | -0.007      |
|             | 9.75   | 0           | 0.008           | -0.008      |
|             | 1.75   | 0.75        | 0.758           | -0.008      |
|             | 8.75   | 0.014       | 0.021           | -0.01       |
|             | 1.25   | 0.822       | 0.835           | -0.013      |
|             | 6.25   | 0.076       | 0.093           | -0.017      |
|             | 6.75   | 0.056       | 0.076           | -0.02       |
|             | 4.25   | 0.257       | 0.288           | -0.031      |
|             | 3.75   | 0.398       | 0.398           | -0.039      |
|             | 2.25   | 0.612       | 0.661           | -0.049      |
|             | 2.75   | 0.543       | 0.61            | -0.067      |
|             | 3.25   | 0.388       | 0.479           | -0.091      |

  

| Test result | vPosGE | Sensitivity | 1 - specificity | Yoden index |
|-------------|--------|-------------|-----------------|-------------|
| CD87 score  | 2.25   | 0.398       | 0.648           | -0.25       |
|             | 2.75   | 0.339       | 0.589           | -0.25       |
|             | 1.75   | 0.526       | 0.771           | -0.245      |
|             | 3.25   | 0.227       | 0.449           | -0.222      |
|             | 3.75   | 0.191       | 0.394           | -0.203      |
|             | 1.25   | 0.658       | 0.856           | -0.198      |
|             | 0.25   | 0.938       | 0.938           | -0.188      |
|             | 4.75   | 0.109       | 0.271           | -0.162      |
|             | 0.75   | 0.806       | 0.953           | -0.147      |
|             | 5.25   | 0.076       | 0.195           | -0.119      |
|             | 2.25   | 0.875       | 0.979           | -0.104      |
|             | 5.75   | 0.066       | 0.169           | -0.103      |
|             | 6.25   | 0.03        | 0.119           | -0.089      |
|             | 6.75   | 0.026       | 0.097           | -0.071      |
|             | 7.25   | 0.013       | 0.068           | -0.055      |
|             | 8.25   | 0           | 0.025           | -0.025      |
|             | 7.75   | 0.007       | 0.013           | -0.023      |
|             | 8.75   | 0           | 0.013           | -0.013      |
|             | 9.75   | 0           | 0.008           | -0.008      |
|             | 11.25  | 0           | 0.004           | -0.004      |
|             | -1     | 1           | 1               | 0           |
|             | 13     | 0           | 0               | 0           |

  

| Test result | vPosGE | Sensitivity | 1 - specificity | Yoden index |
|-------------|--------|-------------|-----------------|-------------|
| HLA8 score  | 2.25   | 0.368       | 0.657           | -0.289      |
|             | 2.75   | 0.299       | 0.572           | -0.273      |
|             | 3.25   | 0.197       | 0.441           | -0.244      |
|             | 1.75   | 0.5         | 0.737           | -0.237      |
|             | 1.25   | 0.648       | 0.886           | -0.218      |
|             | 1.75   | 0.641       | 0.831           | -0.19       |
|             | 0.25   | 0.909       | 0.92            | -0.183      |
|             | 4.75   | 0.082       | 0.208           | -0.126      |
|             | 0.75   | 0.803       | 0.903           | -0.1        |
|             | 5.25   | 0.056       | 0.153           | -0.097      |
|             | 5.75   | 0.049       | 0.127           | -0.078      |
|             | 6.25   | 0.023       | 0.081           | -0.058      |
|             | 6.75   | 0.023       | 0.068           | -0.045      |
|             | 7.25   | 0.024       | 0.058           | -0.034      |
|             | 7.75   | 0.016       | 0.042           | -0.026      |
|             | 7.75   | 0.013       | 0.03            | -0.017      |
|             | 8.75   | 0.007       | 0.013           | -0.006      |
|             | 10.25  | 0           | 0.004           | -0.004      |
|             | 9.5    | 0.003       | 0.004           | -0.001      |
|             | -1     | 1           | 1               | 0           |
|             | 11.5   | 0           | 0               | 0           |

  

| Test result | vPosGE | Sensitivity | 1 - specificity | Yoden index |
|-------------|--------|-------------|-----------------|-------------|
| HLA3 score  | 3.25   | 0.443       | 0.453           | 0.009       |
|             | 8.25   | 0.013       | 0.021           | 0.008       |
|             | 8.75   | 0.01        | 0.021           | 0.005       |
|             | 3.75   | 0.401       | 0.403           | 0.004       |
|             | 5.25   | 0.178       | 0.183           | 0.004       |
|             | 5.75   | 0.138       | 0.123           | 0.004       |
|             | 9.25   | 0.961       | 0.962           | 0.003       |
|             | 9.75   | 0.003       | 0.004           | 0.003       |
|             | 7.75   | 0.02        | 0.03            | 0.003       |
|             | 7.75   | 0.021       | 0.01            | 0.000       |
|             | 11.5   | 0           | 0               | 0.000       |
|             | 4.25   | 0.296       | 0.271           | -0.001      |
|             | 4.75   | 0.243       | 0.208           | -0.001      |
|             | 7.25   | 0.056       | 0.051           | -0.008      |
|             | 6.75   | 0.076       | 0.068           | -0.013      |
|             | 6.25   | 0.095       | 0.085           | -0.016      |
|             | 2.75   | 0.599       | 0.581           | -0.016      |
|             | 3.25   | 0.641       | 0.641           | -0.019      |
|             | 1.25   | 0.826       | 0.864           | -0.033      |
|             | 1.75   | 0.773       | 0.814           | -0.041      |

  

| Test result | vPosGE | Sensitivity | 1 - specificity | Yoden index |
|-------------|--------|-------------|-----------------|-------------|
| FBL1 score  | 3.75   | 0.428       | 0.379           | 0.055       |
|             | 3.25   | 0.454       | 0.428           | 0.026       |
|             | 5.75   | 0.141       | 0.119           | 0.022       |
|             | 6.25   | 0.095       | 0.076           | 0.019       |
|             | 7.75   | 0.026       | 0.021           | 0.015       |
|             | 5.25   | 0.151       | 0.14            | 0.011       |
|             | 6.75   | 0.069       | 0.059           | 0.01        |
|             | 9.75   | 0.007       | 0               | 0.007       |
|             | 7.25   | 0.043       | 0.038           | 0.005       |
|             | 8.25   | 0.023       | 0.002           | 0.002       |
|             | -1     | 1           | 0               | 0           |
|             | 11.5   | 0           | 0               | 0           |
|             | 8.75   | 0.013       | 0.017           | -0.004      |
|             | 4.25   | 0.277       | 0.275           | -0.021      |
|             | 4.75   | 0.214       | 0.225           | -0.011      |
|             | 0.25   | 0.954       | 0.97            | -0.016      |
|             | 0.75   | 0.931       | 0.949           | -0.018      |
|             | 2.75   | 0.556       | 0.619           | -0.063      |
|             | 1.75   | 0.72        | 0.788           | -0.068      |
|             | 1.25   | 0.809       | 0.881           | -0.072      |
|             | 2.25   | 0.599       | 0.699           | -0.1        |

  

| Test result | vPosGE | Sensitivity | 1 - specificity | Yoden index |
|-------------|--------|-------------|-----------------|-------------|
| FBL2 score  | 4.75   | 0.957       | 0.964           | 0.025       |
|             | 6.25   | 0.086       | 0.064           | 0.022       |
|             | 0.25   | 0.977       | 0.958           | 0.019       |
|             | 5.75   | 0.151       | 0.14            | 0.011       |
|             | 5.25   | 0.171       | 0.161           | 0.011       |
|             | 6.75   | 0.066       | 0.059           | 0.007       |
|             | 7.75   | 0.03        | 0.025           | 0.005       |
|             | 9.75   | 0.007       | 0.004           | 0.003       |
|             | 8.25   | 0.023       | 0.021           | 0.002       |
|             | -1     | 1           | 0               | 0           |
|             | 11.5   | 0           | 0               | 0           |
|             | 4.75   | 0.23        | 0.233           | -0.003      |
|             | 7.25   | 0.046       | 0.051           | -0.005      |
|             | 8.75   | 0.016       | 0.021           | -0.01       |
|             | 1.25   | 0.842       | 0.852           | -0.01       |
|             | 1.75   | 0.753       | 0.78            | -0.027      |
|             | 4.25   | 0.263       | 0.292           | -0.029      |
|             | 2.25   | 0.628       | 0.661           | -0.033      |
|             | 3.25   | 0.421       | 0.462           | -0.041      |
|             | 2.75   | 0.546       | 0.597           | -0.051      |
|             | 3.75   | 0.365       | 0.419           | -0.054      |

  

| Test result | vPosGE | Sensitivity | 1 - specificity | Yoden index |
|-------------|--------|-------------|-----------------|-------------|
| FBL3 score  | 3.25   | 0.181       | 0.247           | -0.061      |
|             | 3.75   | 0.145       | 0.199           | -0.054      |
|             | 2.75   | 0.266       | 0.318           | -0.052      |
|             | 2.25   | 0.339       | 0.381           | -0.042      |
|             | 1.75   | 0.493       | 0.534           | -0.041      |
|             | 0.75   | 0.799       | 0.835           | -0.036      |
|             | 1.25   | 0.602       | 0.636           | -0.034      |
|             | 4.25   | 0.099       | 0.123           | -0.024      |
|             | 0.25   | 0.885       | 0.903           | -0.018      |
|             | 1.75   | 0.888       | 0.892           | -0.007      |
|             | 5.25   | 0.053       | 0.039           | -0.006      |
|             | 6.75   | 0.016       | 0.021           | -0.005      |
|             | 11.5   | 0           | 0.004           | -0.004      |
|             | 6.25   | 0.023       | 0.025           | -0.002      |
|             | -1     | 1           | 1               | 0           |
|             | 7.75   | 0.007       | 0.004           | 0.003       |
|             | 7.25   | 0.016       | 0.013           | 0.003       |
|             | 6.25   | 0.023       | 0.025           | -0.002      |
|             | -1     | 1           | 0               | 0           |
|             | 13     | 0           | 0               | 0           |
|             | 9      | 0.007       | 0.004           | 0.003       |
|             | 7.25   | 0.016       | 0.013           | 0.003       |
|             | 6.25   | 0.023       | 0.025           | -0.002      |
|             | 7.75   | 0.016       | 0.008           | 0.008       |

  

| Test result |
|-------------|
|-------------|

Table S4. Coefficient in LASSO Logistics model

| Variables in the<br>LASSO-Logistics | Coefficient |         |
|-------------------------------------|-------------|---------|
|                                     | min S       | 1- s.e. |
| Intercept                           | -4.708      | -4.266  |
| ACOT1                               | 0.318       | 0.184   |
| CD166                               | 0.231       | 0.092   |
| B7H3                                | 0.298       | 0.150   |
| CXCL12                              | 0.275       | 0.178   |
| HLAA                                | 0.294       | 0.146   |
| CD87                                | -0.227      | -0.106  |
| HLAB                                | -0.287      | -0.164  |
| TRAF1                               | -0.215      | -0.069  |
| CXCL13                              | 0.157       |         |
| PDL1                                | 0.144       |         |
| TRAF2                               | -0.014      |         |
| FADS2                               | 0.146       |         |
| FADS6                               | 0.080       |         |
| PPT2                                | 0.074       |         |

min S, minimum S; 1-s.e., 1- standard error

Table S5. Compound score of 10 patients with gut microbiota in 16S sequencing

|         | ACOT1 | CD166 | B7-H3 | CXCL12 | HLA-A | CD87 | HLA-B | TRAF1 | Compound Score |
|---------|-------|-------|-------|--------|-------|------|-------|-------|----------------|
| EBVaGC1 | 1     | 1     | 1     | 1      | 1     | 0    | 1     | 0     | 0.024602488    |
| EBVaGC2 | 1     | 1     | 1     | 1      | 1     | 0    | 0     | 0     | 0.028860461    |
| EBVaGC3 | 1     | 1     | 0     | 1      | 1     | 1    | 0     | 0     | 0.022488687    |
| EBVaGC4 | 0     | 1     | 1     | 1      | 1     | 0    | 0     | 0     | 0.02412708     |
| EBVnGC1 | 1     | 0     | 1     | 1      | 0     | 1    | 0     | 0     | 0.02063335     |
| EBVnGC2 | 0     | 1     | 1     | 0      | 0     | 1    | 1     | 1     | 0.012579878    |
| EBVnGC3 | 1     | 0     | 1     | 1      | 0     | 0    | 1     | 0     | 0.019493325    |
| EBVnGC4 | 0     | 1     | 0     | 0      | 1     | 1    | 1     | 1     | 0.012530288    |
| EBVnGC5 | 1     | 0     | 1     | 0      | 0     | 0    | 1     | 1     | 0.015292273    |
| EBVnGC6 | 1     | 0     | 0     | 0      | 0     | 1    | 1     | 1     | 0.011879423    |



Table S6. Univariate and Multivariate Cox Proportional Hazard Model in subgroup of EBnGC.

| Clinical parameters                      | Univariate        |            | Multivariate      |            |
|------------------------------------------|-------------------|------------|-------------------|------------|
|                                          | HR (95%CI)        | P value    | HR(95%CI)         | P value    |
| Age ( $\geq 60$ vs. $< 60$ )             | 0.97 (0.80, 1.18) | 0.776      | 0.78 (0.64, 0.95) | 0.015*     |
| TNM stage (III-IV vs. I-II)              | 1.14 (0.89, 1.47) | 0.229      | 1.06 (0.83, 1.37) | 0.634      |
| Lauren type (Diffuse/Mix vs. Intestinal) | 1.80 (1.47, 2.22) | $< 0.01^*$ | 1.54 (1.24, 1.91) | $< 0.01^*$ |
| Chemotherapy (Absent vs. Present)        | 1.06 (0.87, 1.30) | 0.545      | 1.06 (0.88, 1.29) | 0.537      |
| Compound score (high vs. low)            | 3.15 (2.57, 3.86) | $< 0.01^*$ | 3.00 (2.45, 3.70) | $< 0.01^*$ |

\* Statistically significant

Table S7. Univariate and Multivariate Cox Proportional Hazard Model in subgroup of EBaGC.

| Clinical parameters                      | Univariate        |         | Multivariate      |            |
|------------------------------------------|-------------------|---------|-------------------|------------|
|                                          | HR (95%CI)        | P value | HR(95%CI)         | P value    |
| Age ( $\geq 60$ vs. $< 60$ )             | 0.79 (0.45, 1.38) | 0.397   | 0.68 (0.35, 1.32) | 0.256      |
| TNM stage (III-IV vs. I-II)              | 0.75 (0.35, 1.61) | 0.459   | 1.17 (0.53, 2.60) | 0.701      |
| Lauren type (Diffuse/Mix vs. Intestinal) | 1.24 (0.65, 2.38) | 0.509   | 0.99 (0.47, 2.07) | 0.978      |
| Chemotherapy (Absent vs. Present)        | 2.57 (1.38, 4.78) | 0.030*  | 2.41 (1.16, 4.98) | 0.018*     |
| Compound score (high vs. low)            | 2.84 (1.53, 5.26) | 0.010*  | 3.30 (1.70, 6.41) | $< 0.01^*$ |

\* Statistically significant
